# Supplementary material for: Activity of Phage–Lactoferrin Mixture against Multi Drug Resistant Staphylococcus aureus Biofilms
Source: MDPI journal article supplement (doi:10.3390/antibiotics11091256), 2022-09-16
Supplement: s1 [file s1]

**Table S1** P values for statistical comparison between influence of phage vB\_SauM-D and vB\_SauM-D+0.1 Lf on cell count (CFU/mL) of MDRSA biofilm

|                | MDRSA strain no. |        |        |        |        |        |        |        |        |        |        |
|----------------|------------------|--------|--------|--------|--------|--------|--------|--------|--------|--------|--------|
|                | 44               | 70     | 110    | 113    | 115    | 124    | 203    | 316    | 317    | 352    | 370    |
| <b>P value</b> | 0,0042           | 0,0039 | 0,1456 | 0,1689 | 0,0011 | 0,0394 | 0,0170 | 0,0186 | 0,0173 | 0,0027 | 0,0042 |
|                | **               | **     | ns     | ns     | **     | *      | *      | *      | *      | **     | **     |

**Table S2** P values for statistical comparison between influence of phage vB\_SauM-D and vB\_SauM-D+0.1 Lf on cell count (CFU/mL) of MDRSA biofilm

|                | MDRSA strain no. |        |        |        |        |        |
|----------------|------------------|--------|--------|--------|--------|--------|
|                | 70               | 113    | 124    | 203    | 352    | 370    |
| <b>P value</b> | 0,0141           | 0,3173 | 0,1662 | 0,1998 | 0,0547 | 0,0257 |
|                | *                | ns     | ns     | ns     | ns     | *      |
